# Supplementary material
Source: PubMed Central journal article supplement (PMC6456922)
Supplement: jc.2017-02249.sd1.pdf [file jc.2017-02249.sd1.pdf]

1  
2  
3  
4  
5  
6  
7

## SUPPLEMENT

Supplement to: Adgent MA, Umbach DM, Zemel BS, *et al.*

A longitudinal study of estrogen-responsive tissues and hormone concentrations in infants fed soy  
formula

|    |                                                                                                      |      |
|----|------------------------------------------------------------------------------------------------------|------|
| 8  | <b>Table of Contents</b>                                                                             | Page |
| 9  | Supplemental Materials and Methods: Additional Details                                               |      |
| 10 | Study Design and Recruitment                                                                         | 3    |
| 11 | Ultrasound                                                                                           | 4    |
| 12 | Urinary Phytoestrogens                                                                               | 5    |
| 13 | Statistical Analysis                                                                                 | 5    |
| 14 | Supplemental Table 1: Visit Schedule                                                                 | 7    |
| 15 | Supplemental Table 2: Maternal and infant characteristics by feeding group                           | 8    |
| 16 | Supplemental Figure 1: Absolute trajectories: Observed maturation index values and fitted trajectory |      |
| 17 | of maturation index versus age by feeding group                                                      | 10   |
| 18 | Supplemental Figure 2: Absolute trajectories: Observed organ size values and fitted trajectory       |      |
| 19 | of organ size versus age by feeding group                                                            | 12   |
| 20 | Supplemental Figure 3: Observed estradiol (E2) values and fitted E2 trajectory versus age by feeding |      |
| 21 | group in girls.                                                                                      | 14   |
| 22 | Supplemental Figure 4: Follicle Stimulating Hormone (FSH) trajectories by feeding group              | 15   |
| 23 | References                                                                                           | 16   |
| 24 |                                                                                                      |      |

## 25 **Methods: Additional Details**

### 26 *Study Design and Recruitment*

27 IFED enrollment occurred between August 2010 and November 2013. Mothers were enrolled on the  
28 basis that they intended to feed their infants simple, exclusive diets throughout the course of study.

29 They were enrolled in the 3<sup>rd</sup> trimester of pregnancy (“prenatal recruitment”) or within 72 hours of the  
30 birth of their baby (“birth recruitment”). For prenatal recruitment, pregnant mothers who were

31 planning to deliver at the Hospital of the University of Pennsylvania (Penn) were recruited from obstetric  
32 and midwifery practices, health clinics, and prenatal classes/activities, all within close proximity to the

33 Children’s Hospital of Philadelphia (CHOP) (November 2010 – April 2012). Birth recruitment began at

34 PENN (August 2010), and later expanded to additional hospitals in order to expedite overall enrollment.

35 Additional recruitment hospitals were introduced as follows: Pennsylvania Hospital (PH) (February

36 2012), Virtua Voorhees (September 2012), Holy Redeemer Hospital (October 2012), Virtua Memorial

37 (November 2012), Cooper Memorial Hospital (January 2013), and Abington Memorial Hospital (February

38 2013). One subject self-referred to the study following birth at Lankenau Hospital (August 2012).

39 Recruitment flyers were placed in Jefferson University Hospital (April 2013), but no enrollments were  
40 procured.

41 Pregnant women were initially screened for eligibility by medical record review/chart abstraction, and

42 then provided verbal consent for a maternal screening interview. All mothers and infants were also

43 screened at birth. Endocrine and thyroid conditions that prompted ineligibility included polycystic ovary

44 syndrome, Cushing’s syndrome, congenital adrenal hyperplasia, Addison’s disease, Grave’s disease,

45 Hashimoto’s thyroiditis, hyperthyroidism, and hypothyroidism. Mothers’ intentions for feeding method

46 were volunteered by mothers during this screening process. Due to their relative abundance,

47 recruitment of breast feeding mothers was completed before April 2012. Mothers feeding soy-protein  
48 formula were less common and were recruited through the end of the recruitment period.

49 Incentives were provided to families at each visit. Families using formula received all formula needed to  
50 feed their infant for the duration of the study in ready-to feed containers. Mothers were offered a  
51 choice of products from Nestlé's (Gerber Good Start [cow] and Gerber Good Start Soy); Mead Johnson  
52 (Enfamil Premium [cow] and Prosobee [soy]); or Abbott (Similac Advanced [cow] Similac Soy Isomil  
53 [soy]). Since most families were eligible for supplemental nutrition through Special Supplemental  
54 Nutrition Program for Women, Infants and Children (WIC), providing formula was not a financial benefit,  
55 but it was much more convenient. Breastfeeding families received an electric breast pump and a  
56 supplemental supply of diapers. The dollar value of the supplies to each feeding group family was about  
57 equal. With signed release forms, photos were taken of the infants at each study visit and compiled into  
58 an album, which was given to the mother at the last study visit.

#### 59 *Ultrasound*

60 Birth ultrasounds were conducted at Penn (n = 223), Pennsylvania Hospital (n = 24), and Virtua Vorhees  
61 Hospital (n = 19); the remaining 17 subjects were scanned at one of the other enrollment hospitals using  
62 instrumentation and procedures described previously (1). Follow-up visits were conducted at CHOP  
63 using three Philips iU22 machines (Philips Healthcare; Bothell, WA) or at Virtua Vorhees using a GE LogiQ  
64 E9 (GE Ultrasound; Wauwatosa, WI), with the exception of four follow up visits from two subjects  
65 completed at Abington Memorial (Philips iU22).

66 Images were obtained by one of seven sonographers, all trained and certified in the study protocol that  
67 defined the order in which images were obtained as well as other organ-specific procedures (1). In  
68 addition, the sonographer completed a quality assurance (QA) image without calipers or measurements;  
69 the IFED radiologist later evaluated a sample of these unmeasured images (approximately 10% of

70 images per sonographer) and the radiologist's measurement was used as a 'gold-standard' in evaluating  
71 inter-rater variability.

## 72 *Urinary Phytoestrogens*

73 We analyzed phytoestrogen content in urine samples from a randomly selected subset of cow-milk  
74 formula-fed (n = 19) and soy formula-fed (n = 20) infants. All samples were collected at 12 weeks of age.  
75 Phytoestrogen concentrations, including genistein, were determined by use of high-performance liquid  
76 chromatography-electrospray ionization-tandem mass spectrometry base on a method described  
77 previously (Centers for Disease Control and Prevention, Atlanta, GA)(2). The limit of detection for  
78 genistein was 0.2 ng/mL; intraassay and interassay CVs were 5.1-5.8% and 3.9-5.8%, respectively.

## 79 *Statistical Analysis*

80 We analyzed differences among feeding groups in maternal and infant characteristics using chi-squared  
81 statistics for categorical characteristics and t-tests for continuous ones. In both instances, we examined  
82 two orthogonal comparisons: 1) infants fed cow-milk formula compared to infants fed soy formula; 2)  
83 breastfed infants compared to all formula-fed infants together. For chi-squared tests, we used PROC  
84 FREQ (SAS v9.3, Cary, NC) to calculate likelihood ratio statistics and compute p values using exact,  
85 instead of asymptotic, methods. For t-tests, we included the three feeding groups as factors in an  
86 analysis of variance and constructed tests using contrasts; we used PROC GLM (SAS v9.3, Cary, NC).  
87 Examination of residuals indicated that assumptions needed for valid analysis of variance were met.

88 We used mixed-effects regression splines to examine age trajectories of cytological, organ-size, and  
89 hormonal outcomes. For the fixed-effects portion of the model, we modeled each feeding-group-  
90 specific trajectory as a natural cubic spline in the square-root of age. We considered splines with from  
91 three to six knots equally spaced in the square root of age, same knot locations for each feeding group.  
92 For the random portion of the mixed-effects model, we allowed a subject-specific random effect for

93 each spline coefficient and modeled those coefficients as mean-zero normal random variables with an  
94 unstructured covariance matrix. More specifically, with  $k$  knots, a natural cubic spline involves  $k$   
95 regression coefficients; consequently, the subject-specific random effects had a  $k \times k$  (symmetric)  
96 variance-covariance matrix common to all feeding groups. Our random specification estimated each  
97 unique entry in the matrix as a distinct parameter. For enhanced numerical stability and to guarantee a  
98 nonnegative estimated matrix, we parameterized this matrix through its Cholesky root. We used PROC  
99 GLIMMIX (SAS v9.3, Cary, NC) to fit these models.

100 We used the Bayesian information criterion (BIC) to select the number of knots that provided a  
101 parsimonious model with adequate fit. This criterion selected a four-knot model for each outcome. In  
102 addition, we examined residuals from each model to verify compliance with needed assumptions. We  
103 also checked whether an additional random-effect to allow for within-subject serial correlation would  
104 improve model fit and found that that additional term was unnecessary for every outcome.

105 To display these postnatal trajectory comparisons (denoted “relative trajectories”), we shifted the fitted  
106 feeding-group-specific trajectories (denoted “absolute trajectories”) vertically to have a common  
107 intercept. Postnatal relative trajectories were calculated by subtracting the predicted response at age  
108 zero from the predicted response at each subsequent age. This difference is zero at age zero. For  
109 maturation index, which we analyzed without transformation, relative trajectories for each feeding  
110 group have intercept zero. For other outcomes, which we analyzed as  $\log_2$ -transformed, relative  
111 trajectories have intercept one, the anti-logarithm of zero. Because a difference in logarithms is the  
112 logarithm of a ratio, the relative trajectories for  $\log_2$ -transformed responses can be interpreted as the  
113 ratio of the response at each subsequent age to the response at age zero.

114 Supplemental Table 1. Visit and measurement schedule for IFED infants

| Procedure     | Measurement          | Birth | 2 weeks | 4 weeks | 6 weeks | 8 weeks | 12 weeks | 16 weeks | 20 weeks | 24 weeks | 28 weeks | 32 weeks | 36 weeks |
|---------------|----------------------|-------|---------|---------|---------|---------|----------|----------|----------|----------|----------|----------|----------|
| <b>Girls</b>  |                      |       |         |         |         |         |          |          |          |          |          |          |          |
| Ultrasound    | Breast               | •     |         | •       |         | ®       |          | •        |          | •        |          | •        |          |
|               | Uterus               | •     |         | •       |         | ®       |          | •        |          | •        |          | •        |          |
| Blood Draw    | E2, FSH              |       | •       | •       | ®       | •       | •        | •        | •        | •        | •        | •        | •        |
| Vaginal Swab  | Maturation Index     | •     | •       | •       | ®       | •       | •        | •        | •        | •        | •        | •        | •        |
| Physical Exam | Length, Weight, etc. | •     | •       | •       | ®       | •       | •        | •        | •        | •        | •        | •        | •        |
| <b>Boys</b>   |                      |       |         |         |         |         |          |          |          |          |          |          |          |
| Ultrasound    | Breast               | •     |         | •       |         | ®       |          | •        |          | •        |          |          |          |
| Blood Draw    | E2                   |       | •       | •       | ®       | •       | •        | •        | •        | •        | •        |          |          |
| Urethral Swab | Maturation Index     | •     | •       | •       | ®       | •       | •        | •        | •        | •        | •        |          |          |
| Physical Exam | Height, Weight, etc. | •     | •       | •       | ®       | •       | •        | •        | •        | •        | •        |          |          |

115 ® Procedure eliminated in June 2012; E2: estradiol; FSH: follicle stimulating hormone

116

117

118

119 Supplemental Table 2. Maternal and infant characteristics by feeding group.

|                                       | <b>Feeding Groups</b> |            |               |                                   |                                         |
|---------------------------------------|-----------------------|------------|---------------|-----------------------------------|-----------------------------------------|
|                                       | <b>Soy</b>            | <b>Cow</b> | <b>Breast</b> | <b>Total Complete<sup>a</sup></b> | <b>Incomplete/ Excluded<sup>b</sup></b> |
| Number of Dyads                       | 102                   | 111        | 70            | 283                               | 127                                     |
| Maternal Race                         |                       |            |               |                                   |                                         |
| Black                                 | 80(78)                | 90(81)     | 29(41)        | 199(70)                           | 77(65)                                  |
| White                                 | 18(18)                | 15(14)     | 30(43)        | 63(22)                            | 28(23)                                  |
| Other/Multi/Unknown                   | 4(4)                  | 6(5)       | 11(16)        | 21(7)                             | 14(12)                                  |
| $\chi^2$ <i>p</i> -value <sup>c</sup> | 0.65                  |            | <0.0001       |                                   | 0.34                                    |
| Maternal Education                    |                       |            |               |                                   |                                         |
| ≤ Some High School                    | 25(25)                | 27(24)     | 0(0)          | 52(18)                            | 25(21)                                  |
| High School or GED                    | 44(43)                | 50(45)     | 16(23)        | 110(39)                           | 40(34)                                  |
| Some College or Assoc.                | 27(26)                | 27(24)     | 20(28)        | 74(26)                            | 34(29)                                  |
| College or >                          | 6(6)                  | 7(6)       | 34(49)        | 47(17)                            | 20(17)                                  |
| $\chi^2$ <i>p</i> -value <sup>c</sup> | 0.99                  |            | <0.0001       |                                   | 0.78                                    |
| Maternal Age (years)                  |                       |            |               |                                   |                                         |
| Mean (Standard Deviation)             | 26.0(5.2)             | 25.5(6.0)  | 27.5(5.3)     | 26.2(5.6)                         | 26.3(5.7)                               |
| Median                                | 26                    | 24         | 28            | 26                                | 26                                      |
| Minimum, Maximum                      | 18, 43                | 18, 42     | 18, 38        | 18, 43                            | 18, 43                                  |
| <i>p</i> -value <sup>d</sup>          | 0.47                  |            | 0.02          |                                   | 0.79                                    |
| Sex                                   |                       |            |               |                                   |                                         |
| Girls                                 | 48(47)                | 56(50)     | 32(46)        | 136(48)                           | 60(50)                                  |
| Boys                                  | 54(53)                | 55(50)     | 38(54)        | 147(52)                           | 59(50)                                  |
| $\chi^2$ <i>p</i> -value <sup>c</sup> | 0.68                  |            | 0.68          |                                   | 0.74                                    |
| Neonatal Weight, <sup>e</sup> kg      |                       |            |               |                                   |                                         |
| Mean (Standard Deviation)             | 3.22(0.4)             | 3.15(0.4)  | 3.28(0.4)     | 3.21(0.4)                         | 3.19(0.4)                               |
| Median                                | 3.25                  | 3.11       | 3.28          | 3.18                              | 3.19                                    |
| Minimum, Maximum                      | 2.40, 4.12            | 2.36, 4.28 | 2.51, 4.20    | 2.36, 4.28                        | 2.49, 4.21                              |
| <i>p</i> -value <sup>d</sup>          | 0.16                  |            | 0.07          |                                   | 0.58                                    |
| Gestational Age, weeks                |                       |            |               |                                   |                                         |
| 37                                    | 8(8)                  | 11(10)     | 4(6)          | 23(8)                             | 10(8)                                   |
| 38                                    | 15(15)                | 25(23)     | 11(16)        | 51(18)                            | 24(20)                                  |
| 39                                    | 50(49)                | 36(32)     | 20(28)        | 106(38)                           | 43(36)                                  |
| 40                                    | 23(22)                | 27(24)     | 19(27)        | 69(24)                            | 28(24)                                  |
| 41                                    | 6(6)                  | 12(11)     | 16(23)        | 34(12)                            | 14(12)                                  |
| $\chi^2$ <i>p</i> -value <sup>c</sup> | 0.13                  |            | 0.03          |                                   | 0.99                                    |
| Feeding Group at Enrollment           |                       |            |               |                                   |                                         |
| Soy formula                           |                       |            |               | 102(36)                           | 48(38)                                  |
| Cow-milk formula                      |                       |            |               | 111(39)                           | 40(31)                                  |
| Breast milk                           |                       |            |               | 70(25)                            | 39(31)                                  |
| $\chi^2$ <i>p</i> -value <sup>c</sup> |                       |            |               |                                   | 0.98                                    |

120

121 Entries for categorical variables are number of infants (percentage of feeding-group total); entries for  
 122 continuous variables are named in the respective rows.



123 <sup>a</sup>Total Complete: IFED subjects who contributed a minimum of 3 (boys) to 4 (girls) blood samples and who were  
124 included in analysis

125 <sup>b</sup>Incomplete/Excluded: subjects who exited the study, did not contribute minimum blood samples and were not  
126 included in analysis. Baseline demographic data were available on 119 of 127 incomplete/excluded dyads.

127 <sup>c</sup> $\chi^2$  p- values are from exact tests based on likelihood ratio statistics. Entry between Cow and Soy columns  
128 compares those two feeding groups; entry under Breast compares the breast-fed group with the cow- and soy-  
129 formula-fed groups combined; entry under Incomplete/Excluded compares Total Complete (included IFED  
130 subjects who completed study) to Incomplete/Excluded (subjects that did not complete the study).

131 <sup>d</sup>p-values are from t-tests of contrasts comparing means in a one-way analysis of variance. Entries are as  
132 described for  $\chi^2$  p- values.

133 <sup>e</sup>Neonatal weight is based on birth visit weight measurement, conducted within first 72 hours after birth.  
134 Neonatal weight is reported for 117 incomplete/excluded subjects.

135

136

137 Supplemental Figure 1: Absolute trajectories for maturation index: observed values and fitted  
138 trajectories versus age by feeding group. Panels: a) girls; b) boys. Vertical reference lines indicate  
139 location of knots for fitted spline. Though not explicitly depicted, each girl contributes up to 12  
140 measurements through time; each boy contributes up to 10.

141

142

143

144

145

146

147

148

149

150

151

152

153

154

155

156

157

158

159

160

161 a) Girls  
162

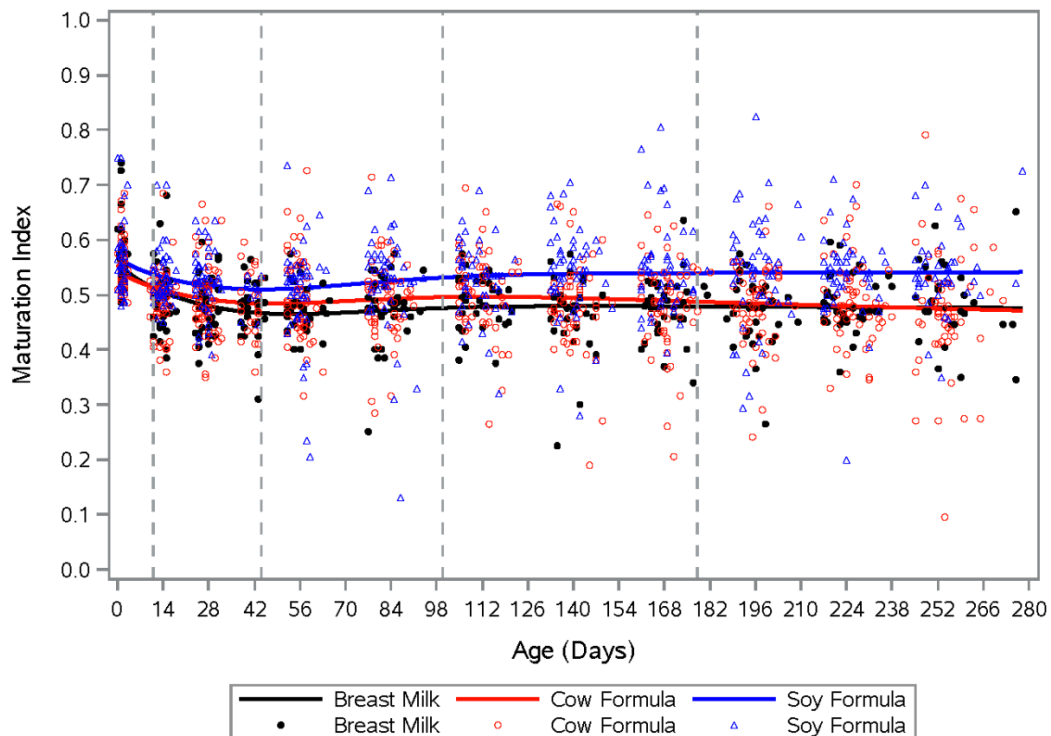

163  
164  
165  
166

b) Boys

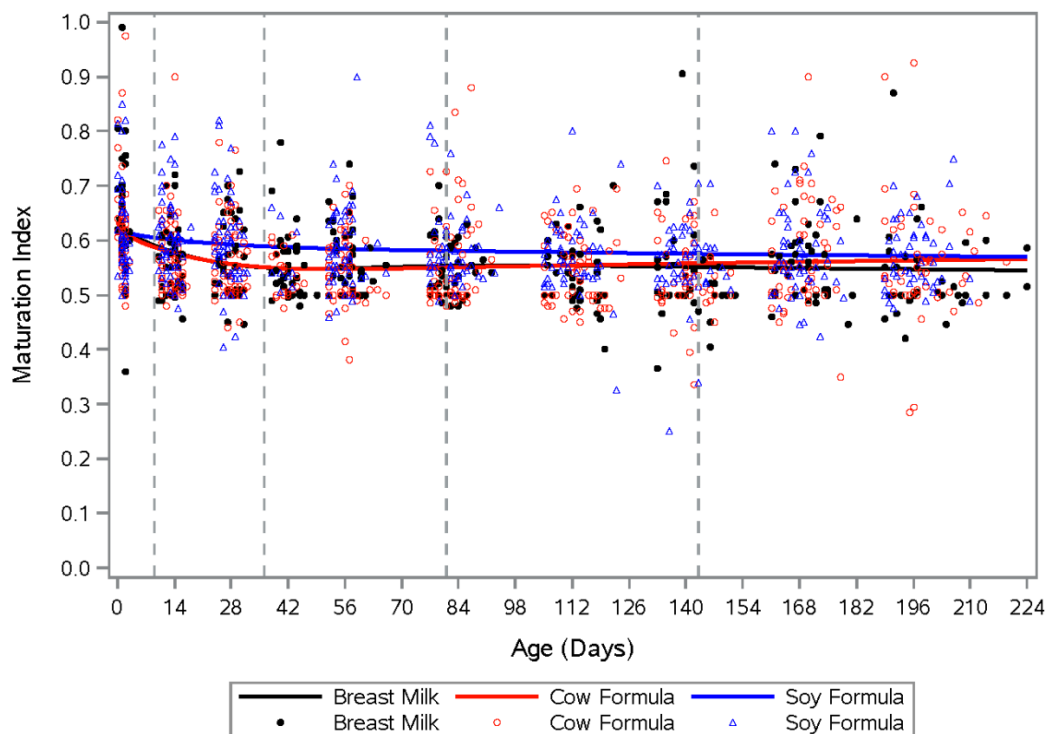

167

168 Supplemental Figure 2: Absolute trajectories for organ size: observed values and fitted trajectories  
169 versus age by feeding group. Panels: a) uterine volume in girls; b) breast-bud diameter in girls; c) breast-  
170 bud diameter in boys. Vertical reference lines indicate location of knots for fitted spline. Though not  
171 explicitly depicted, each girl contributes up to six measurements through time and each boy contributes  
172 up to five.

173 a) Uterine volume

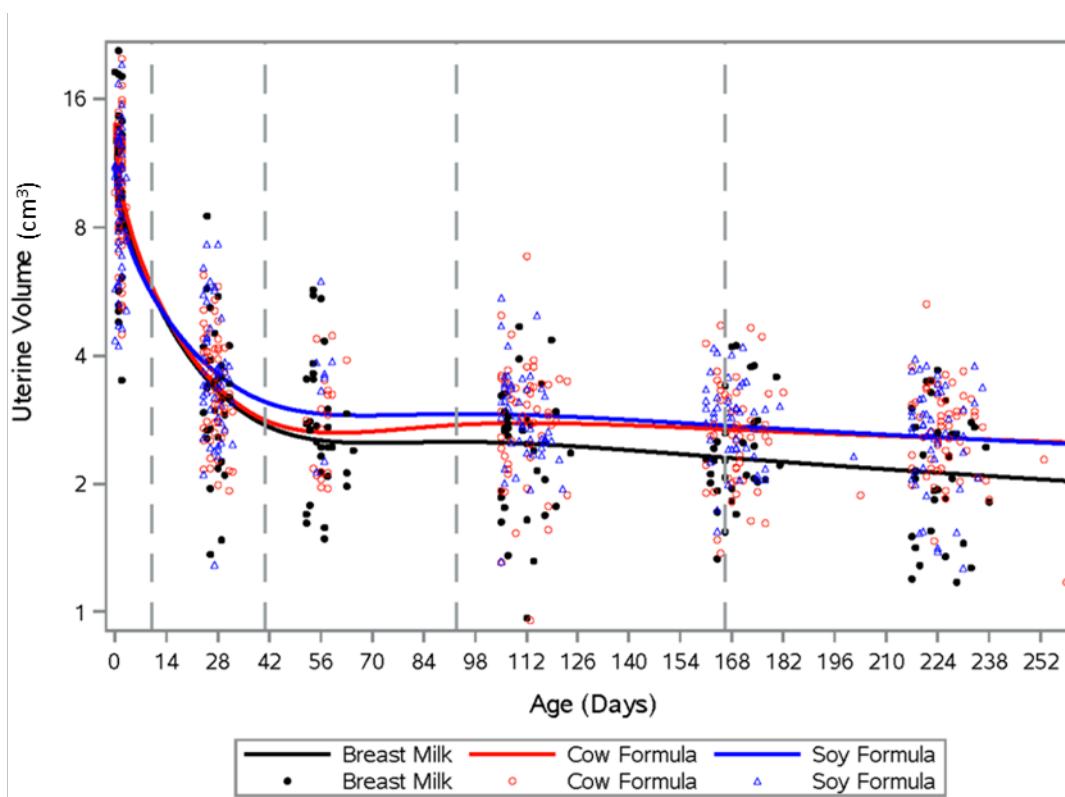

181 b) Breast Bud Diameter, Girls

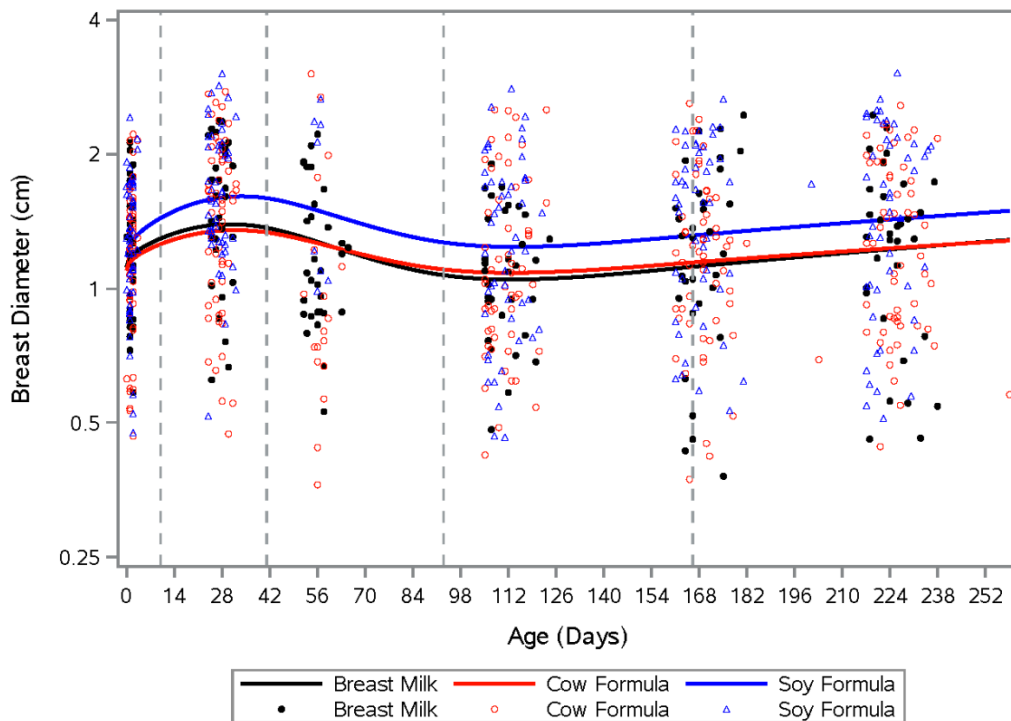

182

183 c) Breast Bud Diameter, Boys

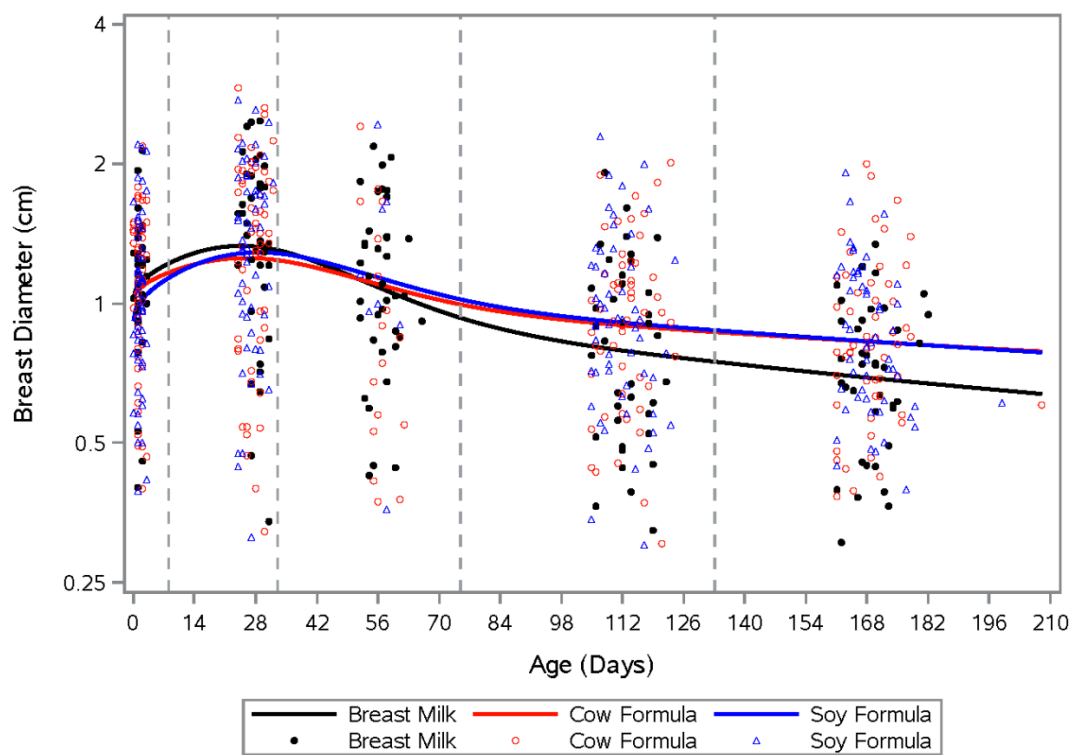

184

185 **Supplemental Figure 3.** Observed E2 values and fitted E2 trajectory versus age by feeding group in girls.  
186 Colors code feeding groups: black, breast milk; red, cow-milk formula; blue, soy formula. Values below  
187 the limit of detection (2.99 pg/mL) are plotted at the limit of detection divided by the square root of 2.  
188 Shaded bands represent 95% pointwise confidence limits for each feeding-group-specific trajectory.  
189 Vertical reference lines indicate location of knots for fitted spline. Each subject contributes up to 11  
190 measurements through time (not depicted). Soy formula vs. cow-milk formula  $p=0.44$ ; soy formula vs.  
191 breast milk  $p=0.02$ ; breast milk vs. cow-milk formula  $p=0.17$ .

192

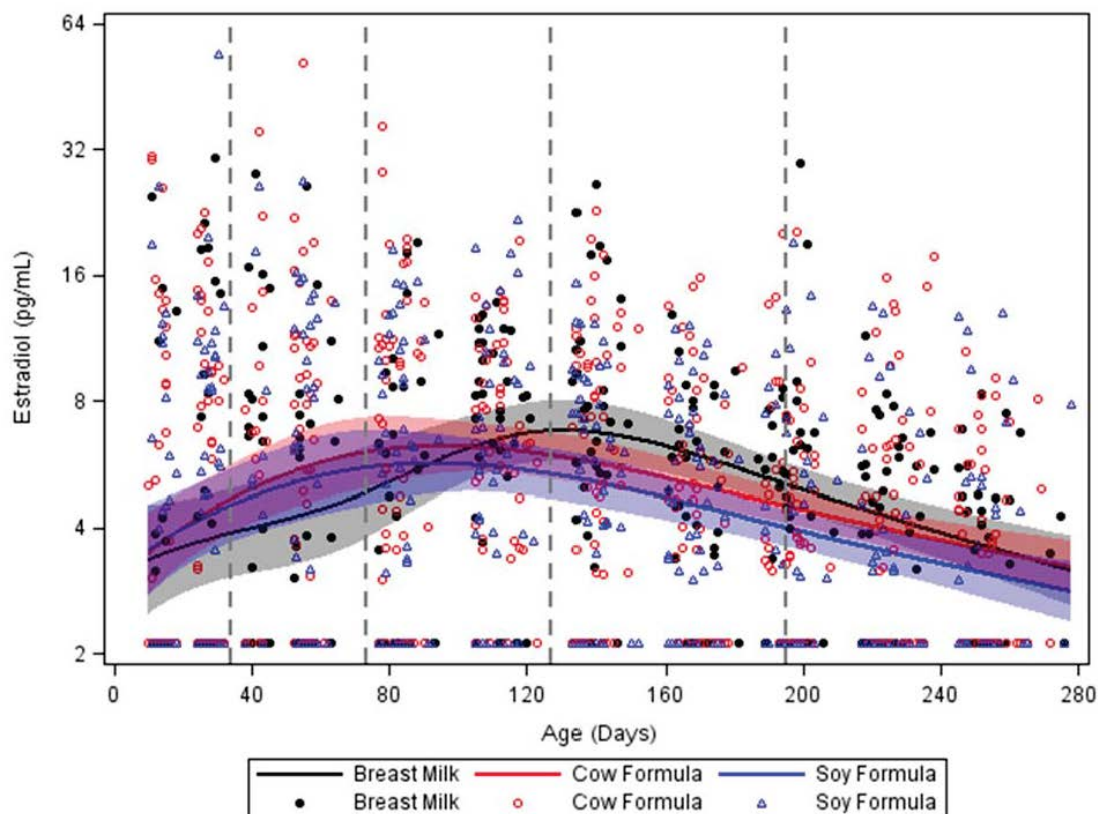

193

194

195

196 Supplemental Figure 4. Follicle stimulating hormone (FSH): observed values and fitted trajectories  
197 versus age by feeding group (girls only). Colors code feeding groups: black, breast milk;  
198 formula; blue, soy formula. Shaded bands represent 95% pointwise confidence limits for each feeding-  
199 group-specific trajectory. Vertical reference lines indicate location of knots for fitted spline. Each girl  
200 contributes up to 11 measurements through time (not depicted).

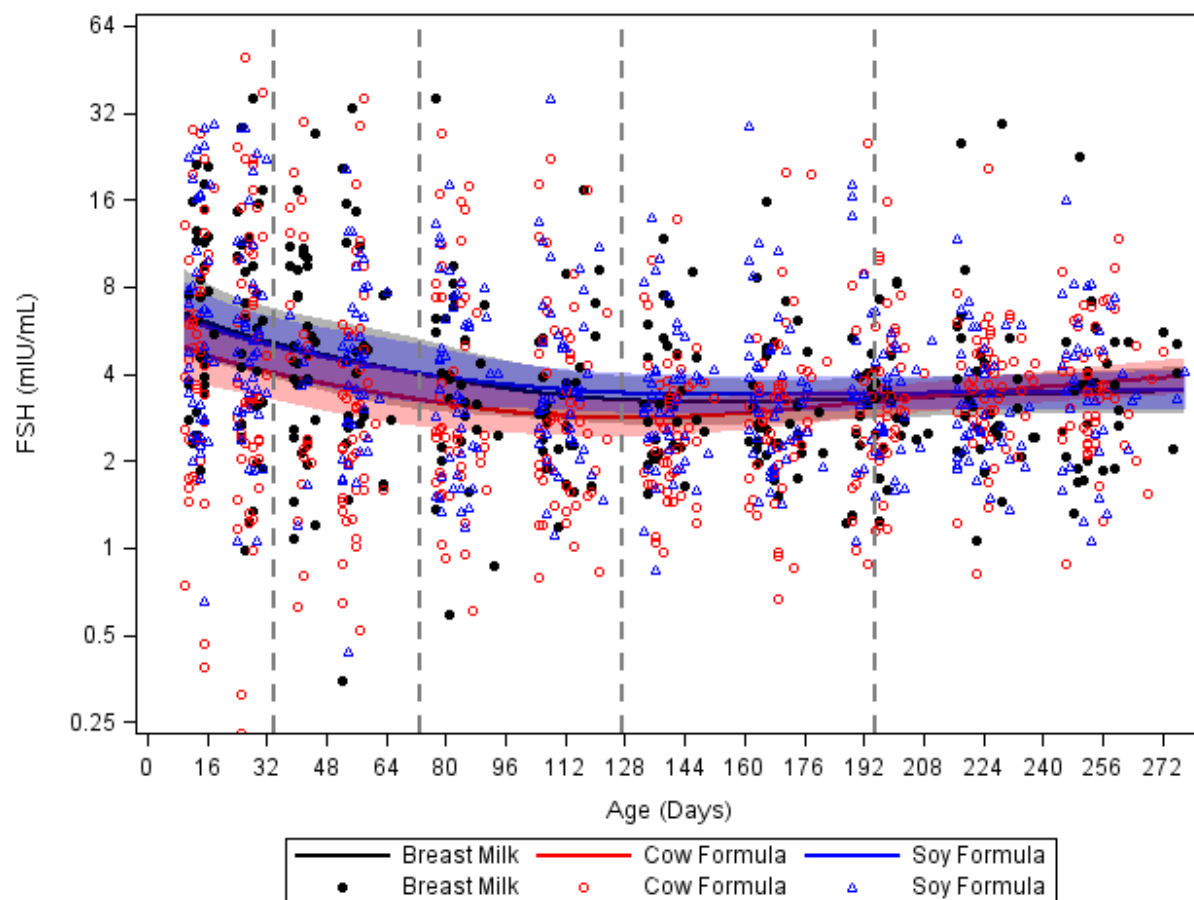

201

202

203

204

## References

- 205  
206  
207 1. Kaplan SL, Edgar JC, Ford EG, Adgent MA, Schall JI, Kelly A, Umbach DM, Rogan WJ, Stallings VA,  
208 and Darge K. Size of testes, ovaries, uterus and breast buds by ultrasound in healthy full-term  
209 neonates ages 0-3 days. *Pediatr Radiol.* 2016;46(13):1837-47.
- 210 2. Parker DL, Rybak ME, and Pfeiffer CM. Phytoestrogen biomonitoring: an extractionless LC-  
211 MS/MS method for measuring urinary isoflavones and lignans by use of atmospheric pressure  
212 photoionization (APPI). *Anal Bioanal Chem.* 2012;402(3):1123-36.

213

214
